# Supplementary material
Source: publisher site journal article supplement (https://www.dovepress.com/article/supplementary_file/607618/607618_Supplementary%20Table%20S1_1_1.docx)
Supplement: Supplementary file 1 [file 607618_Supplementary%20Table%20S1_1_1.docx]

**Supplementary Table S1.** Assessment of Data Distribution Using Normality Tests

| **Variable** | **Kolmogorov–Smirnov Statistic** | **df** | **p-value** | **Shapiro–Wilk Statistic** | **df** | **p-value** |
| --- | --- | --- | --- | --- | --- | --- |
| **Age (years)** | 0.246 | 293 | **<0.001** | 0.878 | 293 | **<0.001** |
| **Number of children** | 0.101 | 293 | **<0.001** | 0.956 | 293 | **<0.001** |
| **UI knowledge score** | 0.139 | 293 | **<0.001** | 0.941 | 293 | **<0.001** |
| **Healthcare worker** | 0.534 | 293 | **<0.001** | 0.319 | 293 | **<0.001** |
| **Marital status (currently married)** | 0.518 | 293 | **<0.001** | 0.406 | 293 | **<0.001** |
| **Monthly household income (JOD)** | 0.375 | 293 | **<0.001** | 0.698 | 293 | **<0.001** |
| **Educational level** | 0.218 | 293 | **<0.001** | 0.828 | 293 | **<0.001** |
| **Menstrual status** | 0.359 | 293 | **<0.001** | 0.687 | 293 | **<0.001** |
| **Prior consultation with a urologist or urogynecologist** | 0.483 | 293 | **<0.001** | 0.509 | 293 | **<0.001** |
| **History of UI** | 0.358 | 293 | **<0.001** | 0.635 | 293 | **<0.001** |
| **History of POP** | 0.345 | 293 | **<0.001** | 0.636 | 293 | **<0.001** |
| **History of treatment for UI** | 0.453 | 293 | **<0.001** | 0.562 | 293 | **<0.001** |
| **History of treatment for POP** | 0.431 | 293 | **<0.001** | 0.590 | 293 | **<0.001** |

Abbreviations: df, degrees of freedom; UI, urinary incontinence; POP, pelvic organ prolapse.

Normality was assessed using the Kolmogorov-Smirnov test with Lilliefors correction and the Shapiro-Wilk test. A p-value < 0.05 indicates a significant deviation from a normal distribution. Bold p-values indicate statistically significant deviation from normality. All variables demonstrated significant deviation from normality (p < 0.001), supporting the use of non-parametric statistical methods.
